# Supplementary material for: TCR Sequencing in Mouse Models of Allorecognition Unveils the Features of Directly and Indirectly Activated Clonotypes
Source: MDPI journal article supplement (doi:10.3390/ijms241512075), 2023-07-28
Supplement: s1 [file s1]

## Supplementary Material

### TCR sequencing in mouse models of solid organ transplantation unveils the features of allorecognition.

Tereshchenko V., Shevyrev D., Fisher M., Bulygin A., Khantakova J, Sennikov S.

\* Correspondence: Tereshchenko Valeriy [tervp91@gmail.com](mailto:tervp91@gmail.com) [tereschenko.vp@talantiuspeh.ru](mailto:tereschenko.vp@talantiuspeh.ru)

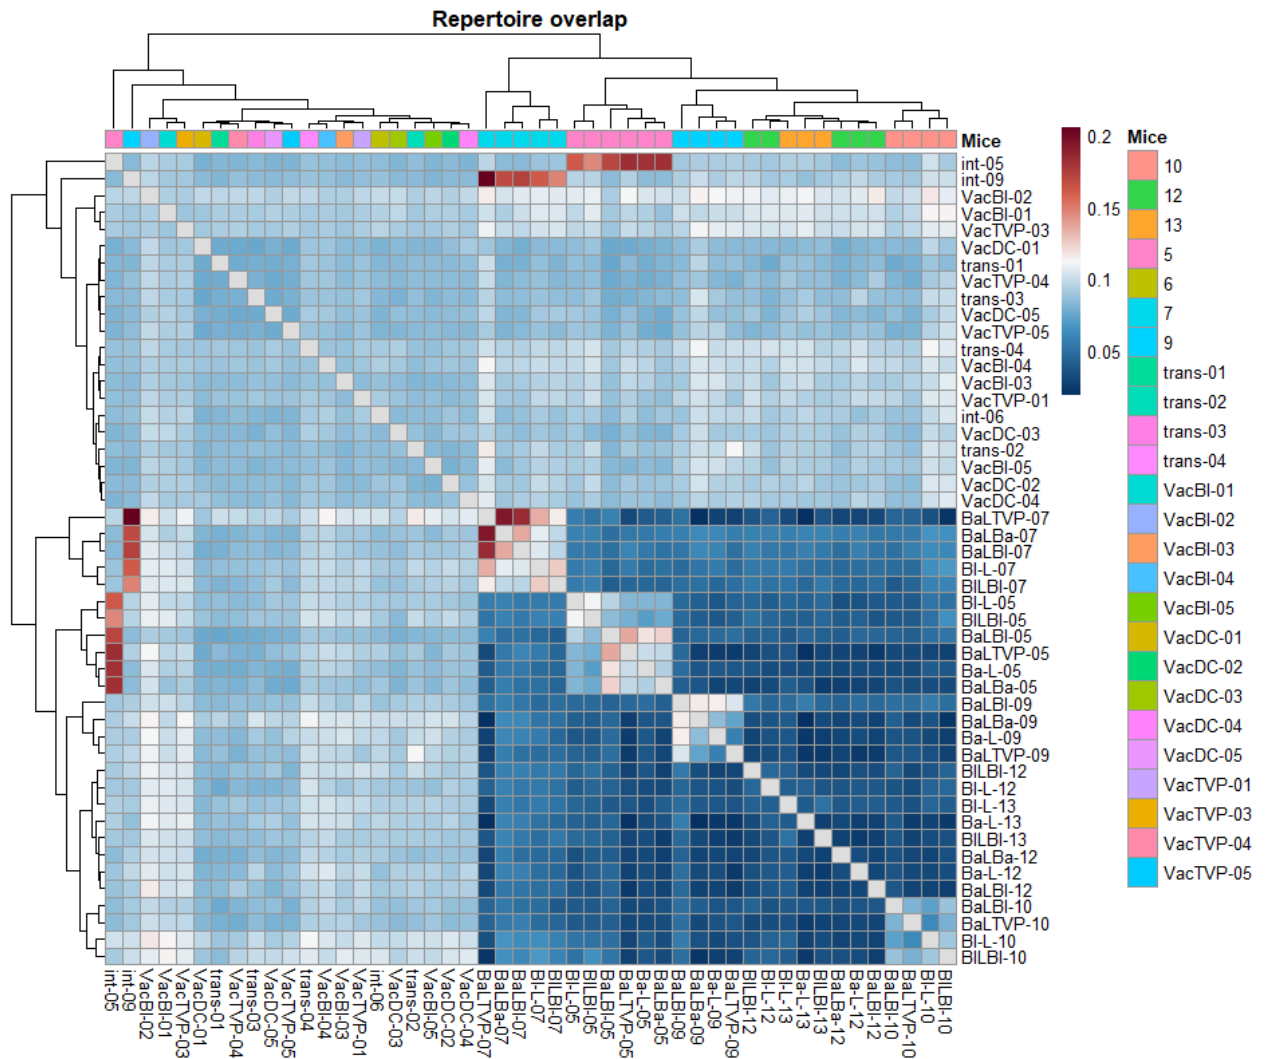

**Figure S1.**  $\beta$ TCR repertoire overlap of all obtained samples. Samples obtained from the single mouse depicted with the single color. Mice ID on axes. Morisita's similarity index. 0 – complete dissimilarity, 1 – complete similarity

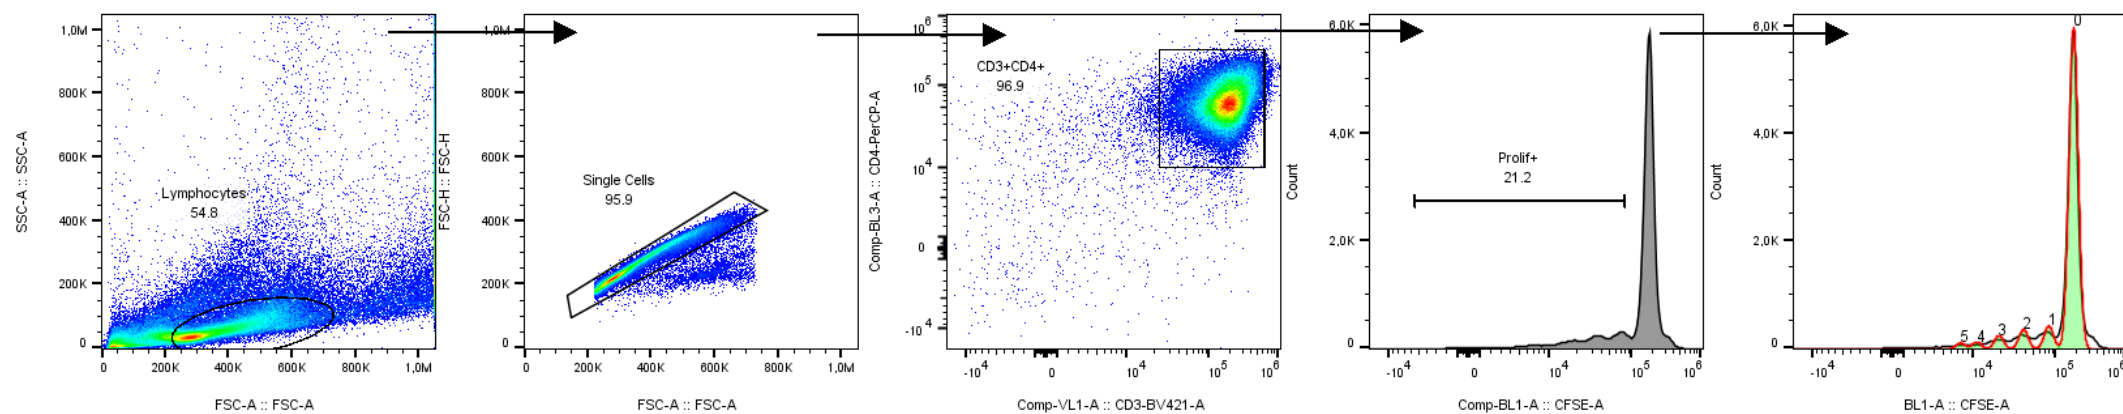

**Figure S2.** An example of CD4<sup>+</sup> lymphocytes proliferation in MLC measured by CFSE dilution.

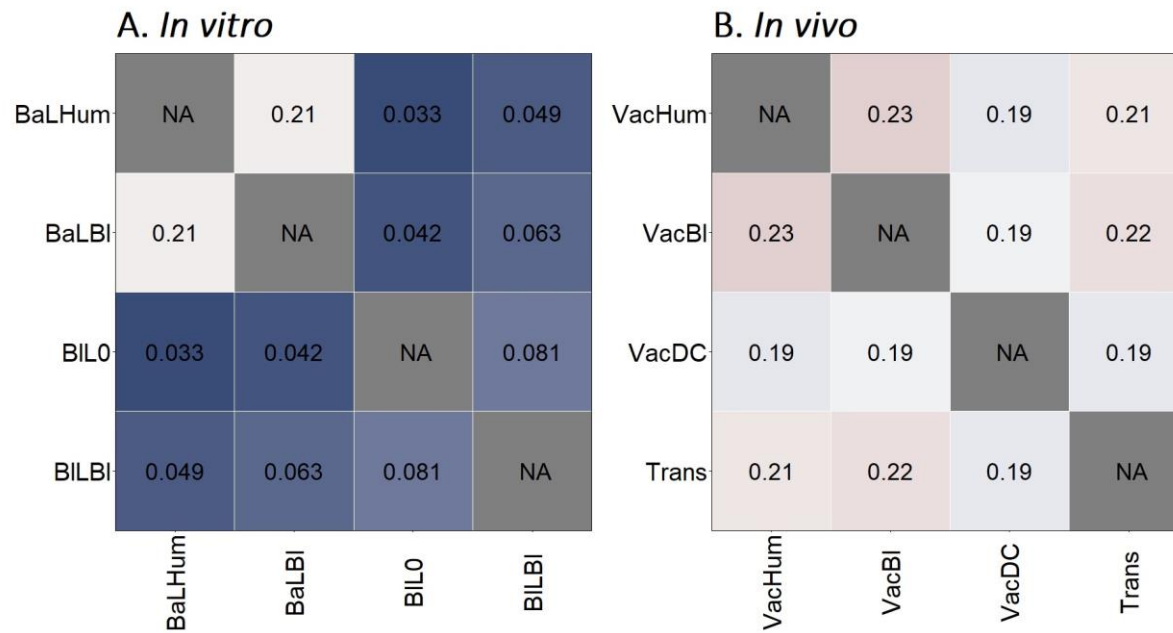

**Figure S3.**  $\beta$ TCR repertoire overlap of unexpanded *in vitro* and *in vivo* samples combined by stimulation type. Morisita's similarity index. 0 – complete dissimilarity, 1 – complete similarity.

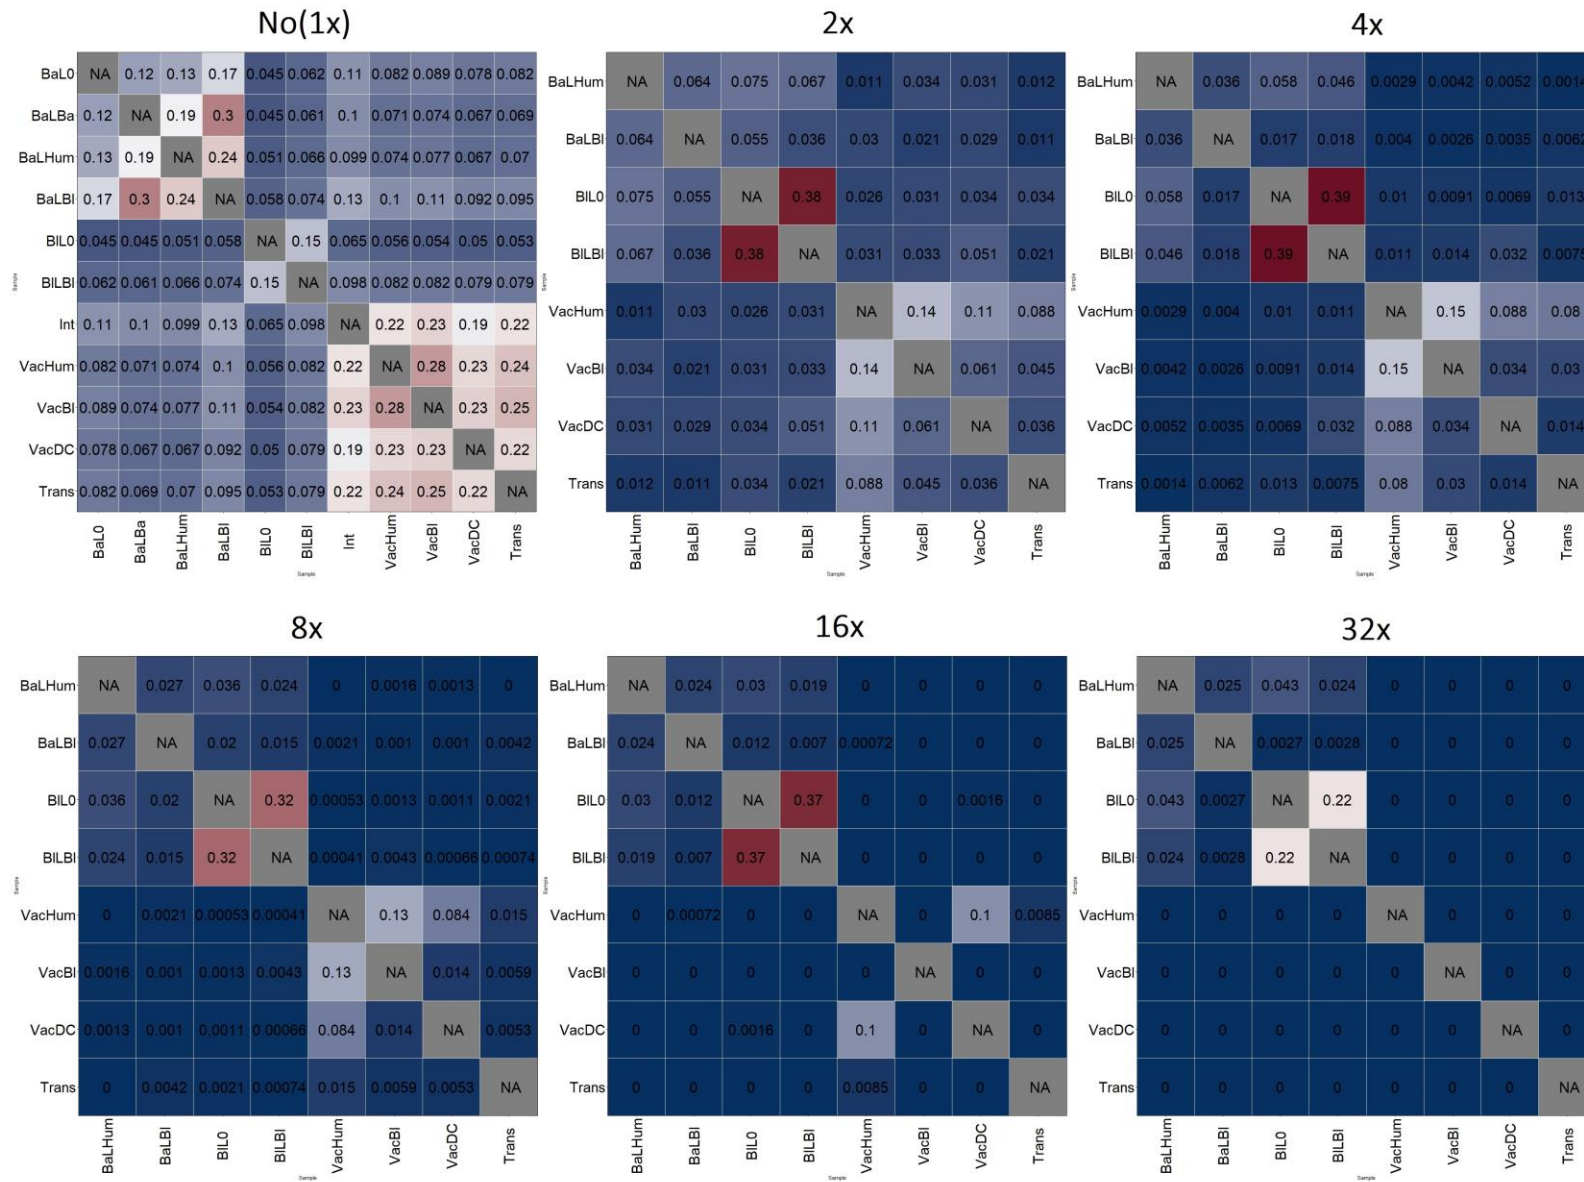

**Figure S4.**  $\beta$ TCR repertoire overlap of *in vitro* and *in vivo* samples combined by stimulation type. No(1x), 2x, 4x, 8x, 16x, 32x – fold expansion threshold. Morisita's similarity index. 0 – complete dissimilarity, 1 – complete similarity.

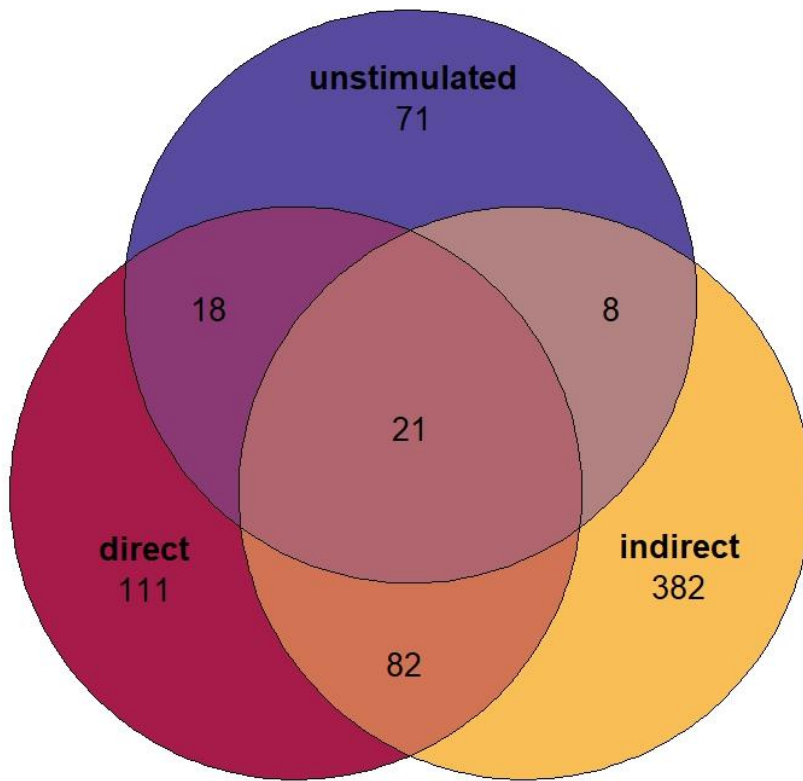

**Figure S5.** A. An example of CD4<sup>+</sup> lymphocytes proliferation in MLC measured by flow cytometry. B. Intersection of GLIPH2 a.a. patterns for directly, indirectly alloreactive and unstimulated repertoires.

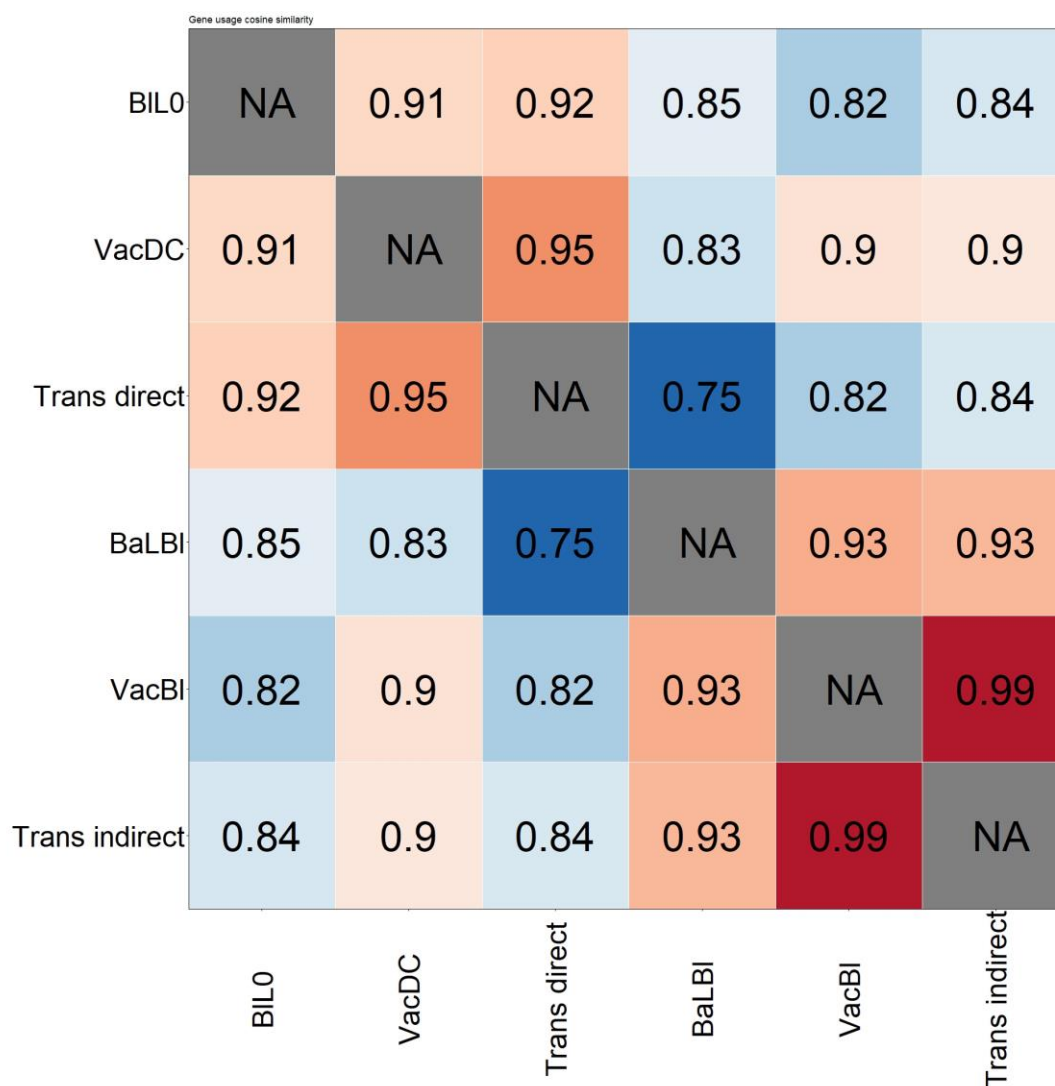

**Figure S6.** Cosine similarity of V gene usage of clones corresponding to direct (BIL0, VacDC, Trans direct) and indirect (BaLBI, VacBI, Trans indirect) aa patterns. 0 – complete dissimilarity, 1 – complete similarity.
